# Supplementary material
Source: PubMed Central journal article supplement (PMC2408753)
Supplement: NIHMS51737-supplement-6.pdf [file NIHMS51737-supplement-6.pdf]

Supplementary Figure 1

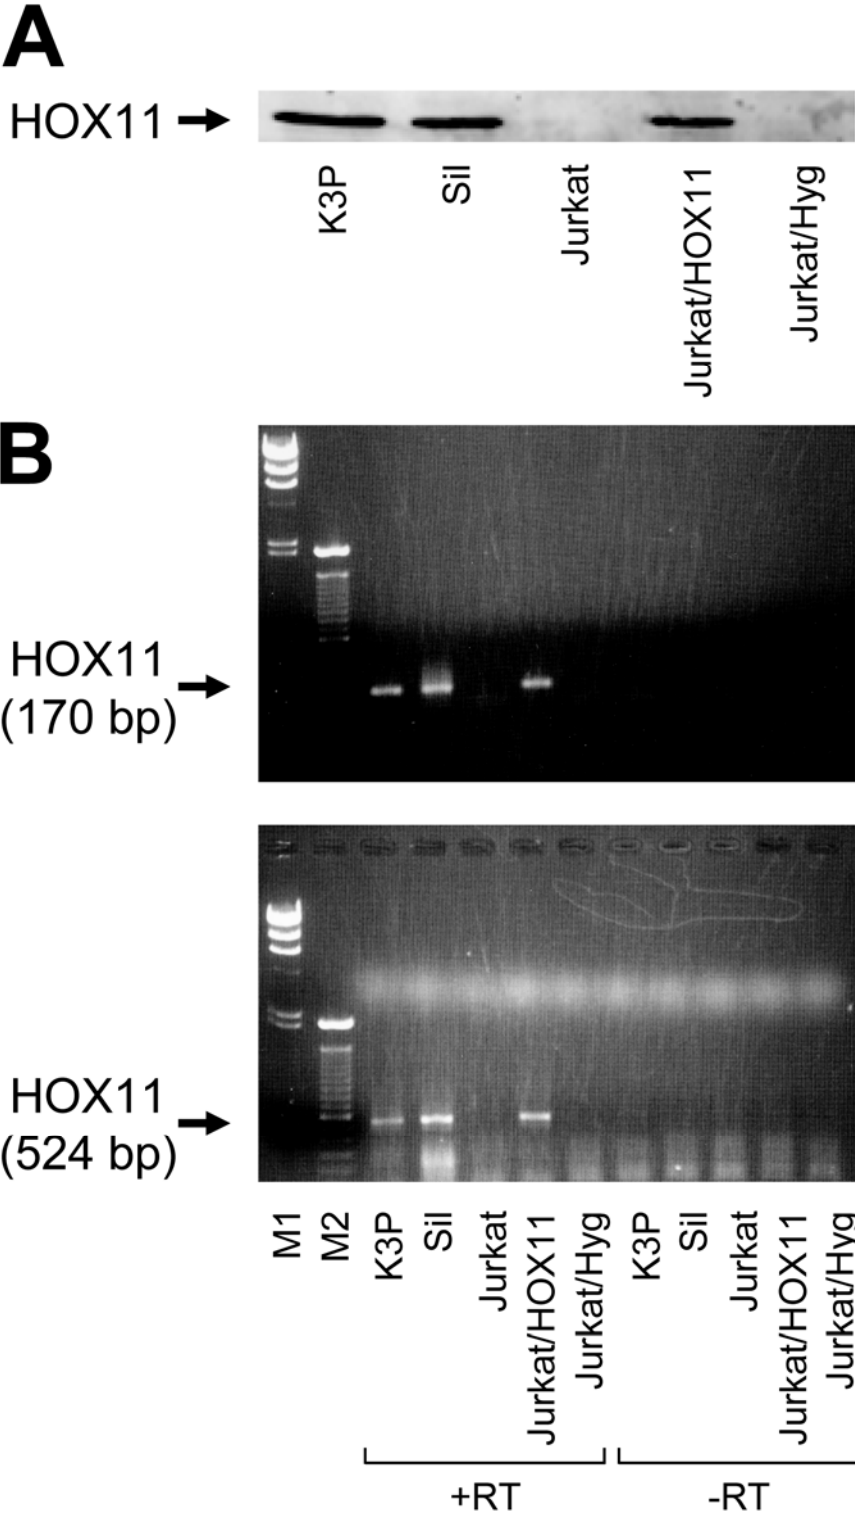

**Supplementary Figure 1.** Western blot and RT-PCR analyses of HOX11 expression in T-ALL cells. (A) Western blot analysis with an affinity-purified anti-HOX11 rabbit polyclonal antibody (HOX11 C18; Santa Cruz Biotechnology, Santa Cruz, CA) demonstrating that the HOX11 protein levels in Jurkat cells stably transduced with the MSCVhyg-HOX11 retroviral vector (Jurkat/HOX11) are comparable to those in HOX11<sup>+</sup> K3P and Sil cells. (B) RT-PCR analyses using two sets of HOX11-specific primers flanking introns of the HOX11 gene confirmed the HOX11 Western blotting findings. Upper gel: Oligonucleotide primers flanking the first intron of the HOX11 gene, sense primer 5'-GCGTCAACAACCTCACTGGC-3' and antisense primer 5'-GTGGAAGCGCTTCTCCAGCT-3' were used to detect HOX11 mRNA as a 170-bp product (Lu *et al.* 1992). Lower gel: Oligonucleotide primers flanking the first and second introns of the HOX11 gene, sense primer 5'-ATGCCGGGCGTCAACAACC-3' and antisense primer 5'-GGGCAGAATGGGCAGGCTCAC -3' were used to detect HOX11 mRNA as a 524-bp product (Salvati *et al.* 1995). Oligonucleotide primers which detect  $\beta$ -actin mRNA as a 661-bp RT-PCR product (Salvati *et al.* 1995) were used to monitor RNA quality (data not shown). Abbreviations: M1, *Hind*III-digested  $\lambda$  phage DNA molecular weight marker; M2, 100-bp ladder (Invitrogen Corp., Carlsbad, CA) molecular weight marker; +RT, RT-PCR analysis of 4  $\mu$ g total RNA; -RT, PCR analysis of RNA samples carried out in the absence of reverse transcriptase.

## References

- Lu M, Zhang N and Ho AD. (1992). *Oncogene*, **7**, 1325-1330.
- Salvati PD, Ranford PR, Ford J and Kees UR. (1995). *Oncogene*, **11**, 1333-1338.
